# Supplementary material for: Physicochemical Properties of Granular and Gelatinized Lotus Rhizome Starch with Varied Proximate Compositions and Structural Characteristics
Source: MDPI journal article supplement (doi:10.3390/foods12234330), 2023-11-30
Supplement: s1 [file s1]

# Supplementary

## Physicochemical properties of granular and gelatinized lotus rhizome starch with varied proximate compositions and structural characteristics

Xin-Yu Jiang <sup>1</sup>, Yi-Ting Gu <sup>1</sup>, Lichao Zhang <sup>1,2</sup>, Jin-Jian Sun <sup>3</sup>, Jia-Nan Yan <sup>1</sup>, Ce Wang <sup>1</sup>, Bin Lai <sup>1</sup> and Hai-Tao Wu <sup>1\*</sup>

<sup>1</sup> SKL of Marine Food Processing & Safety Control, National Engineering Research Center of Seafood, Collaborative Innovation Center of Seafood Deep Processing, School of Food Science and Technology, Dalian Polytechnic University, Dalian 116034, China;

<sup>2</sup> Institutes of Biomedical Sciences, Shanxi University, Taiyuan 030006, China;

<sup>3</sup> Dalian Center for Food and Drug Control and Certification, Dalian 116037, China.

\* Correspondence: [wht205@163.com](mailto:wht205@163.com) (H. W.); Tel: 86-411-86318731; Fax: 86-411-86318655

Table S1. Color of five LRS powder and gel

| Sample | Powder                  |                         |                         |                          | Gel                     |                         |                          |                         |
|--------|-------------------------|-------------------------|-------------------------|--------------------------|-------------------------|-------------------------|--------------------------|-------------------------|
|        | L*                      | a*                      | b*                      | Whiteness                | L*                      | a*                      | b*                       | Whiteness               |
| LRP-1  | 89.58±0.73 <sup>b</sup> | 3.07±0.04 <sup>b</sup>  | 9.66±0.20 <sup>a</sup>  | 85.46±0.67 <sup>c</sup>  | 26.57±0.25 <sup>d</sup> | -1.28±0.28 <sup>a</sup> | -10.57±0.33 <sup>b</sup> | 25.80±0.23 <sup>d</sup> |
| LRP-2  | 89.29±0.57 <sup>b</sup> | 3.44±0.10 <sup>cd</sup> | 10.70±0.19 <sup>c</sup> | 84.47±0.32 <sup>bc</sup> | 25.88±1.30 <sup>d</sup> | -1.27±0.28 <sup>a</sup> | -9.78±0.38 <sup>b</sup>  | 25.22±1.26 <sup>d</sup> |
| LRP-3  | 83.45±0.57 <sup>a</sup> | 3.48±0.04 <sup>c</sup>  | 10.18±0.10 <sup>b</sup> | 80.26±0.45 <sup>a</sup>  | 4.15±0.22 <sup>a</sup>  | 2.28±0.56 <sup>d</sup>  | -14.43±0.19 <sup>a</sup> | 3.05±0.24 <sup>a</sup>  |
| LRP-4  | 88.48±0.32 <sup>b</sup> | 3.62±0.06 <sup>d</sup>  | 10.12±0.12 <sup>b</sup> | 84.24±0.24 <sup>b</sup>  | 21.66±0.99 <sup>c</sup> | -0.69±0.12 <sup>b</sup> | -10.57±0.70 <sup>b</sup> | 20.95±1.05 <sup>c</sup> |
| LRP-5  | 89.19±0.54 <sup>b</sup> | 2.92±0.05 <sup>a</sup>  | 10.75±0.12 <sup>c</sup> | 84.47±0.30 <sup>bc</sup> | 14.54±1.83 <sup>b</sup> | 0.57±0.32 <sup>c</sup>  | -9.99±0.88 <sup>b</sup>  | 13.95±1.73 <sup>b</sup> |

Data are reported as means±SD from triplicate determinations. Different letters in the same column indicate significant differences ( $P<0.05$ ). L\*, lightness; a\*, redness; b\*, yellowness.

a

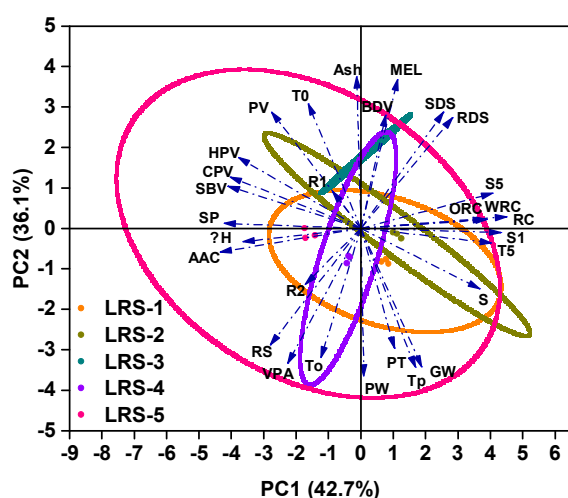

b

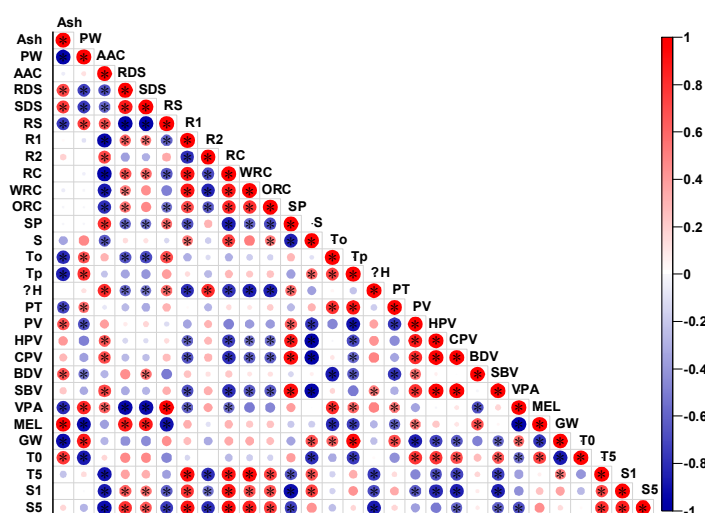

Figure S1. Principal component analysis (a, 95% confidence ellipse) and Pearson correlation coefficients (b,  $*P < 0.05$ ) and between the basic physicochemical and functional properties of LRS. PW, powder whiteness; AAC, apparent amylose content; RDS, rapidly digested starch; SDS, slowly digested starch; RS, resistant starch; R1,  $R_{1045/1022}$ ; R2,  $R_{1022/995}$ ; RC, relative crystallinity; WRC, water retention capacity; ORC, oil retention capacity; SP, swelling power at 90 °C; S, solubility at 90 °C; To, onset gelatinization temperature; Tp, peak gelatinization temperature;  $\Delta H$ , enthalpy for starch gelatinization; PT, pasting temperature; PV, peak viscosity; HPV, hot paste viscosity; CPV, cold paste viscosity; BDV, breakdown viscosity; SBV, setback viscosity; VPA, vessels percentage area; MEL, mean E lacunarity; GW, gel whiteness; T0, turbidity at day 0; T5, turbidity at day 5; S1, syneresis of the first freeze-thaw cycle; S5, syneresis of the 5th freeze-thaw cycle.

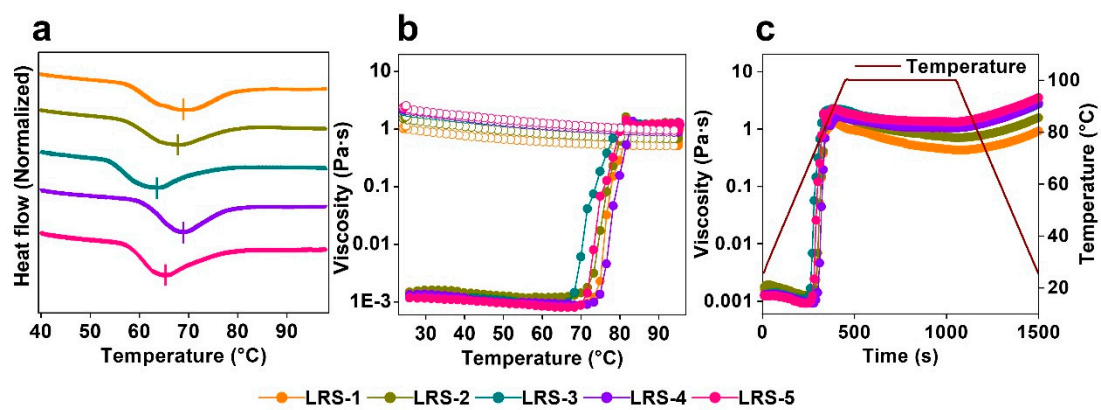

Figure S2. Thermal properties (a) and pasting properties (b and c) curves of five LRS samples.
